# Supplementary material for: Elevation of plasma podoplanin in Kawasaki disease
Source: publisher site journal article supplement (doi:10.1515/labmed-2024-0214), 2025-05-07
Supplement: Supplementary file 1 [file j_labmed-2024-0214_suppl_002.docx]

**Table S1. Blood coagulation parameters in the KD-CAL and KD-NCAL groups.**

|  | KD-CAL  (n=25) | KD-NCAL  (n=38) | p-Value |
| --- | --- | --- | --- |
| PLT (×109/L) | 440.90±166.04 | 410.53±106.84 | 0.764 |
| FIB (g/L) | 5.04±1.94 | 4.89±1.99 | 0.784 |
| D-D (mg/L FEU) | 1.72±0.06 | 0.82±0.96 | < 0.001 |
| PT (sec) | 12.13±0.69 | 12.04±1.02 | 0.903 |
| APTT (sec) | 31.05±3.01 | 30.25±3.85 | 0.932 |
| TT (sec) | 17.05±1.21 | 17.12±1.04 | 0.861 |

KD, Kawasaki disease; CAL, coronary artery lesions; NCAL, non-CAL; PLT, platelet counts; PT, prothrombin time; APTT, activated partial thromboplastin time; FIB, fibrinogen; TT, thrombin time.
