# Supplementary material for: Elevation of plasma podoplanin in Kawasaki disease
Source: publisher site journal article supplement (doi:10.1515/labmed-2024-0214), 2025-05-07
Supplement: Supplementary file 1 [file j_labmed-2024-0214_suppl_003.docx]

**Figure S1:** ROC curves using PDPN and GPVI for evaluating the predictive utility in patients with KD. *p<0.05; **p<0.01; ***p<0.001. AUC, area under the curve; ROC, receiver operator characteristic; KD, Kawasaki disease.
